# Supplementary material
Source: HighWire-hosted journal article supplement (https://le.uwpress.org/highwire/filestream/3118/field_highwire_adjunct_files/3/LE-99-2-Isenhardt-appD.pdf)
Supplement: LE-99-2-Isenhardt-appD.pdf [file LE-99-2-Isenhardt-appD.pdf]

## Appendix D: Robustness checks

We additionally performed two- and three-nearest neighbor matching as well as Kernel matching, all based on the Mahalanobis distance. Model specifications are as specified as in Section 4. Kernel matching follows Cameron and Trivedi (2008) and we rely on a Gauss-Kernel with bandwidth selection following Wand and Jones (1994).

### References

Cameron, A. Colin, and Pravin K. Trivedi. 2008. *Microeconometrics: Methods and Applications*. 7. print. Cambridge: Cambridge Univ. Press.

Wand, Matt P., and M.C Jones. 1994. “Multivariate Plug-in Bandwidth Selection.” *Computational Statistics* 9 (97-116).

White, Halbert. 1980. “A Heteroskedasticity-Consistent Covariance Matrix Estimator and a Direct Test for Heteroskedasticity.” *Econometrica* 48 (4): 817–38.

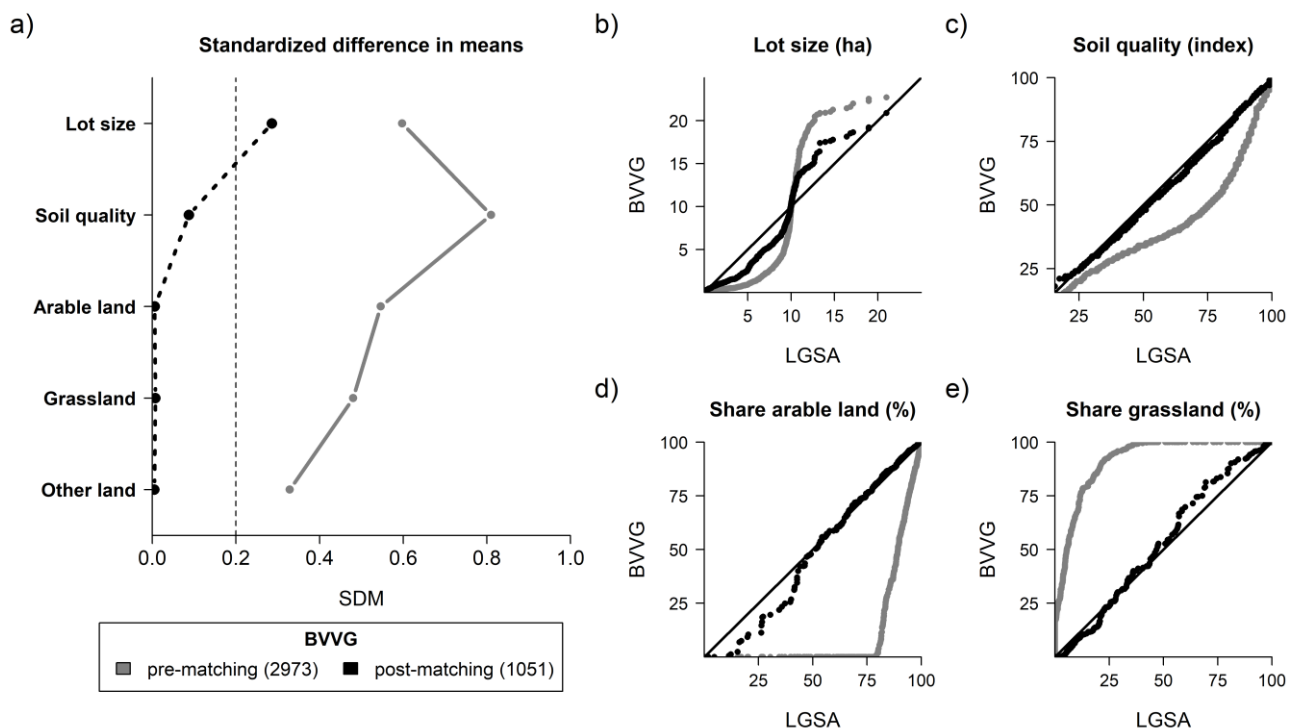

**Figure D1:** Matching Quality: Two-nearest neighbor matching based on Mahalanobis Distance

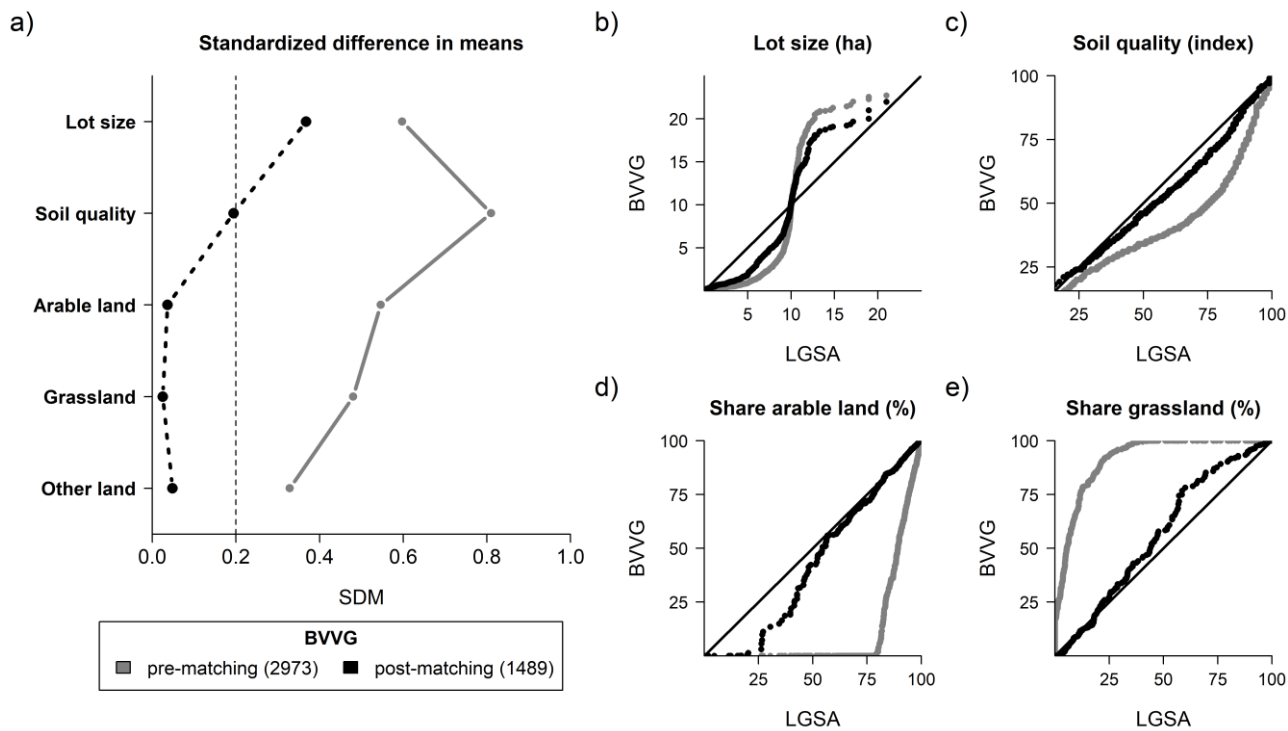

**Figure D2:** Matching Quality: Three-nearest neighbor matching based on Mahalanobis Distance

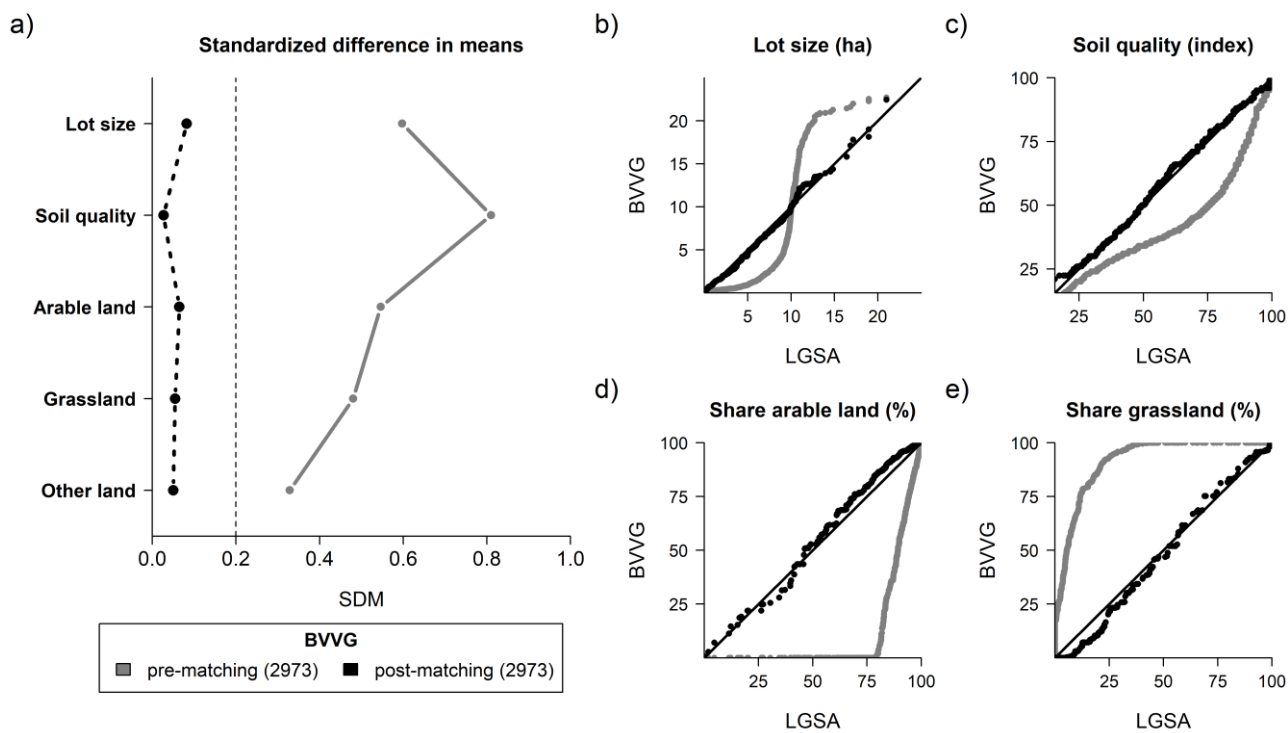

**Figure D3:** Matching Quality: Kernel matching based on Mahalanobis Distance

**Table D1:** Post-matching regression results: Two-nearest neighbor matching based on Mahalanobis Distance

|                                        | (3a)              | (3b)                    | (5a)              | (5b)               | (5c)               |
|----------------------------------------|-------------------|-------------------------|-------------------|--------------------|--------------------|
|                                        | ln(n-1)           | ln(n <sup>nRH</sup> -1) | log(p)            | log(p)             | log(p)             |
| Intercept                              | 0.337*** (0.103)  | 0.166 (0.120)           |                   |                    |                    |
| <i>Hedonic characteristics</i>         |                   |                         |                   |                    |                    |
| Soil quality                           | 0.008*** (0.001)  | 0.010*** (0.001)        | 0.013*** (0.000)  | 0.013 *** (0.000)  | 0.012 *** (0.000)  |
| Lot Size <sup>2</sup>                  | 0.002*** (0.000)  | 0.002*** (0.000)        | 0.001*** (0.000)  | 0.001 *** (0.000)  | 0.001 *** (0.000)  |
| Share grassland                        | -0.004*** (0.001) | -0.005*** (0.001)       | -0.006*** (0.000) | -0.006 *** (0.000) | -0.006 *** (0.000) |
| Share other land                       | -0.013*** (0.002) | -0.015*** (0.003)       | -0.011*** (0.001) | -0.011 *** (0.001) | -0.011 *** (0.001) |
| <i>Participant class</i>               |                   |                         |                   |                    |                    |
| #Participants: 2                       |                   |                         | -1.181*** (0.043) | -1.164 *** (0.046) | -1.144 *** (0.042) |
| #Participants: 3                       |                   |                         | -1.121*** (0.044) | -1.097 *** (0.046) | -1.097 *** (0.043) |
| #Participants: 4                       |                   |                         | -1.084*** (0.045) | -1.039 *** (0.047) | -1.071 *** (0.044) |
| #Participants: 5                       |                   |                         | -1.017*** (0.047) | -1.004 *** (0.049) | -1.010 *** (0.045) |
| #Participants: 6-8                     |                   |                         | -0.977*** (0.046) | -1.001 *** (0.046) | -0.974 *** (0.044) |
| #Participants: 9+                      |                   |                         | -0.929*** (0.049) | -0.958 *** (0.049) | -0.927 *** (0.047) |
| <i>Tenant support effects with RFR</i> |                   |                         |                   |                    |                    |
| LGSA                                   | -0.073** (0.034)  | -0.320*** (0.037)       | -0.162*** (0.014) |                    |                    |
| LGSA: #Participants: 2                 |                   |                         |                   | -0.177 *** (0.036) |                    |
| LGSA: #Participants: 3                 |                   |                         |                   | -0.191 *** (0.028) |                    |
| LGSA: #Participants: 4                 |                   |                         |                   | -0.230 *** (0.030) |                    |
| LGSA: #Participants: 5                 |                   |                         |                   | -0.166 *** (0.032) |                    |
| LGSA: #Participants: 6-8               |                   |                         |                   | -0.087 *** (0.024) |                    |
| LGSA: #Participants: 9+                |                   |                         |                   | -0.067 ** (0.030)  |                    |
| LGSA: Tenant exercised RFR             |                   |                         |                   |                    | -0.167 *** (0.016) |
| LGSA: Tenant won by own bid            |                   |                         |                   |                    | -0.381 *** (0.029) |
| LGSA: Tenant rejected RFR              |                   |                         |                   |                    | -0.051 *** (0.017) |
| Weight                                 | Yes               | Yes                     | Yes               | Yes                | Yes                |
| Year and county dummy                  | Yes               | Yes                     | Yes               | Yes                | Yes                |
| Treated Observations                   | 926               | 929                     | 926               | 926                | 926                |
| Control Observations                   | 1051              | 1051                    | 1051              | 1051               | 1051               |
| Pseudo-R <sup>2</sup> / R <sup>2</sup> | 0.275             | 0.303                   | 0.868             | 0.869              | 0.869              |
| $\theta$                               | 13.72 (1.84)      | 8.91 (0.98)             |                   |                    |                    |

Note: Heteroscedasticity-consistent standard errors in parentheses (White 1980). Asterisks indicate \*p = <0.1; \*\*p = <0.05; \*\*\*p = <0.01. For (3a)-(3b), the pseudo-R<sup>2</sup> is specified as the squared correlation coefficient between observed and fitted values.

**Table D2:** Parameter estimates for county and year dummy variables: Two-nearest neighbor matching based on Mahalanobis Distance

|                        | (3a)      |         | (3b)                    |         | (5a)      |         | (5b)       |         | (5c)       |         |
|------------------------|-----------|---------|-------------------------|---------|-----------|---------|------------|---------|------------|---------|
|                        | ln(n-1)   |         | ln(n <sup>nRH</sup> -1) |         | log(p)    |         | log(p)     |         | log(p)     |         |
| <i>Year</i>            |           |         |                         |         |           |         |            |         |            |         |
| 2008                   | 0.016     | (0.084) | 0.039                   | (0.097) | 0.247***  | (0.032) | 0.235 ***  | (0.032) | 0.239 ***  | (0.031) |
| 2009                   | 0.170**   | (0.077) | 0.189**                 | (0.090) | 0.326***  | (0.030) | 0.319 ***  | (0.030) | 0.331 ***  | (0.028) |
| 2010                   | 0.087     | (0.084) | 0.117                   | (0.096) | 0.445***  | (0.031) | 0.438 ***  | (0.031) | 0.445 ***  | (0.030) |
| 2011                   | 0.182**   | (0.080) | 0.202**                 | (0.091) | 0.591***  | (0.031) | 0.592 ***  | (0.031) | 0.590 ***  | (0.030) |
| 2012                   | 0.176**   | (0.074) | 0.220**                 | (0.086) | 0.720***  | (0.033) | 0.712 ***  | (0.033) | 0.720 ***  | (0.032) |
| 2013                   | 0.463***  | (0.088) | 0.485***                | (0.096) | 0.871***  | (0.033) | 0.881 ***  | (0.033) | 0.878 ***  | (0.032) |
| 2014                   | 0.185**   | (0.076) | 0.219**                 | (0.088) | 1.049***  | (0.029) | 1.046 ***  | (0.029) | 1.045 ***  | (0.027) |
| 2015                   | 0.087     | (0.079) | 0.109                   | (0.090) | 1.097***  | (0.030) | 1.098 ***  | (0.030) | 1.103 ***  | (0.028) |
| 2016                   | -0.154*   | (0.083) | -0.158                  | (0.097) | 1.104***  | (0.032) | 1.101 ***  | (0.032) | 1.088 ***  | (0.031) |
| 2017                   | -0.185**  | (0.077) | -0.190**                | (0.089) | 1.138***  | (0.030) | 1.134 ***  | (0.030) | 1.142 ***  | (0.029) |
| 2018                   | -0.269*** | (0.089) | -0.257***               | (0.100) | 1.133***  | (0.036) | 1.127 ***  | (0.036) | 1.139 ***  | (0.032) |
| <i>County</i>          |           |         |                         |         |           |         |            |         |            |         |
| Altmarkkreis Salzwedel | 0.447***  | (0.105) | 0.560***                | (0.118) | -0.113**  | (0.051) | -0.109 **  | (0.051) | -0.135 *** | (0.051) |
| Börde                  | 0.375***  | (0.058) | 0.456***                | (0.064) | 0.257***  | (0.025) | 0.251 ***  | (0.025) | 0.244 ***  | (0.024) |
| Burgenlandkreis        | 0.401***  | (0.088) | 0.473***                | (0.094) | 0.132***  | (0.032) | 0.137 ***  | (0.032) | 0.116 ***  | (0.032) |
| Dessau-Roßlau          | -0.012    | (0.086) | -0.164                  | (0.146) | -0.055    | (0.079) | -0.064     | (0.078) | -0.049     | (0.078) |
| Halle (Saale)          | -0.215*   | (0.125) | -0.160                  | (0.125) | 0.110     | (0.174) | 0.091      | (0.172) | 0.095      | (0.176) |
| Harz                   | 0.425***  | (0.066) | 0.514***                | (0.073) | 0.227***  | (0.028) | 0.214 ***  | (0.028) | 0.207 ***  | (0.027) |
| Jerichower Land        | 0.549***  | (0.070) | 0.632***                | (0.081) | -0.096*** | (0.035) | -0.100 *** | (0.035) | -0.095 *** | (0.034) |
| Magdeburg              | 0.032     | (0.122) | -0.005                  | (0.137) | 0.141*    | (0.083) | 0.135 *    | (0.081) | 0.134 *    | (0.076) |
| Mansfeld-Südharz       | 0.184***  | (0.068) | 0.209***                | (0.081) | 0.013     | (0.030) | 0.013      | (0.030) | 0.009      | (0.030) |
| Saalekreis             | 0.371***  | (0.063) | 0.414***                | (0.069) | 0.105***  | (0.027) | 0.104 ***  | (0.027) | 0.102 ***  | (0.027) |
| Salzlandkreis          | 0.129**   | (0.054) | 0.197***                | (0.063) | 0.095***  | (0.024) | 0.088 ***  | (0.024) | 0.071 ***  | (0.024) |
| Stendal                | 0.353***  | (0.096) | 0.418                   | (0.106) | 0.020     | (0.044) | 0.012      | (0.044) | 0.017      | (0.042) |
| Wittenberg             | 0.072     | (0.098) | 0.028                   | (0.132) | -0.269*** | (0.040) | -0.266 *** | (0.039) | -0.259 *** | (0.036) |
| Altenburger Land       | -0.523**  | (0.245) | -0.433*                 | (0.246) | 0.196     | (0.132) | 0.177      | (0.127) | 0.168      | (0.134) |
| Greiz                  | 0.272     | (0.602) | 0.409                   | (0.613) | 0.247***  | (0.070) | 0.246 ***  | (0.065) | 0.222 ***  | (0.065) |
| Kyffhäuserkreis        | 0.619***  | (0.087) | 0.673***                | (0.091) | 0.017     | (0.042) | 0.028      | (0.043) | 0.015      | (0.043) |
| Nordhausen             | 0.325*    | (0.181) | 0.401**                 | (0.179) | 0.222***  | (0.062) | 0.212 ***  | (0.061) | 0.207 ***  | (0.060) |
| Saale Holzland Kreis   | 0.046     | (0.112) | 0.154                   | (0.120) | 0.199**   | (0.080) | 0.181 **   | (0.078) | 0.181 **   | (0.080) |
| Sömmerda               | 0.170     | (0.117) | 0.229*                  | (0.118) | 0.033     | (0.045) | 0.029      | (0.043) | 0.023      | (0.045) |
| Weimarer Land          | 0.189     | (0.197) | 0.294                   | (0.210) | 0.186**   | (0.084) | 0.174 **   | (0.086) | 0.172 **   | (0.084) |
| Leipzig                | 0.597***  | (0.138) | 0.689***                | (0.144) | 0.100     | (0.062) | 0.108 *    | (0.064) | 0.096      | (0.063) |
| Nordsachsen            | 0.675***  | (0.118) | 0.766***                | (0.125) | 0.099*    | (0.060) | 0.106 *    | (0.059) | 0.095      | (0.059) |
| Elbe-Elster            | 0.108     | (0.127) | 0.232*                  | (0.132) | -0.264*** | (0.074) | -0.287 *** | (0.073) | -0.288 *** | (0.074) |
| Havelland              | 0.475***  | (0.117) | 0.592***                | (0.123) | -0.111*** | (0.041) | -0.119 *** | (0.040) | -0.123 *** | (0.040) |
| Ostprignitz-Ruppin     | 0.510**   | (0.203) | 0.637***                | (0.207) | 0.027     | (0.088) | 0.019      | (0.087) | 0.009      | (0.085) |
| Potsdam-Mittelmark     | 0.362*    | (0.188) | 0.480**                 | (0.190) | -0.240*** | (0.063) | -0.250 *** | (0.062) | -0.259 *** | (0.063) |
| Prignitz               | 0.272     | (0.173) | 0.396**                 | (0.175) | 0.070     | (0.064) | 0.059      | (0.063) | 0.048      | (0.064) |
| Teltow-Fläming         | -0.149    | (0.221) | -0.009                  | (0.231) | 0.005     | (0.107) | -0.010     | (0.109) | -0.027     | (0.109) |

Note: Heteroscedasticity-consistent standard errors in parentheses (White 1980). Asterisks indicate \*p &lt; 0.1; \*\*p &lt; 0.05; \*\*\*p &lt; 0.01.

**Table D3:** Post-matching regression results: Three-nearest neighbor matching based on Mahalanobis Distance

|                                        | (3a)              | (3b)                    | (5a)              | (5b)              | (5c)              |
|----------------------------------------|-------------------|-------------------------|-------------------|-------------------|-------------------|
|                                        | ln(n-1)           | ln(n <sup>nRH</sup> -1) | log(p)            | log(p)            | log(p)            |
| Intercept                              | 0.423*** (0.097)  | 0.281** (0.110)         |                   |                   |                   |
| <i>Hedonic characteristics</i>         |                   |                         |                   |                   |                   |
| Soil quality                           | 0.007*** (0.001)  | 0.008*** (0.001)        | 0.012*** (0.000)  | 0.012*** (0.000)  | 0.012*** (0.000)  |
| Lot Size <sup>2</sup>                  | 0.002*** (0.000)  | 0.002*** (0.000)        | 0.001*** (0.000)  | 0.001*** (0.000)  | 0.001*** (0.000)  |
| Share grassland                        | -0.004*** (0.001) | -0.005*** (0.001)       | -0.006*** (0.000) | -0.006*** (0.000) | -0.006*** (0.000) |
| Share other land                       | -0.015*** (0.002) | -0.016*** (0.002)       | -0.011*** (0.001) | -0.011*** (0.001) | -0.011*** (0.001) |
| <i>Participant class</i>               |                   |                         |                   |                   |                   |
| #Participants: 2                       |                   |                         | -1.115*** (0.043) | -1.102*** (0.044) | -1.082*** (0.042) |
| #Participants: 3                       |                   |                         | -1.037*** (0.044) | -1.011*** (0.045) | -1.014*** (0.042) |
| #Participants: 4                       |                   |                         | -1.009*** (0.044) | -0.974*** (0.045) | -0.995*** (0.043) |
| #Participants: 5                       |                   |                         | -0.935*** (0.045) | -0.919*** (0.047) | -0.926*** (0.044) |
| #Participants: 6-8                     |                   |                         | -0.894*** (0.045) | -0.910*** (0.045) | -0.889*** (0.043) |
| #Participants: 9+                      |                   |                         | -0.828*** (0.047) | -0.839*** (0.047) | -0.822*** (0.046) |
| <i>Tenant support effects with RFR</i> |                   |                         |                   |                   |                   |
| LGSA                                   | -0.068** (0.032)  | -0.317*** (0.036)       | -0.165*** (0.014) |                   |                   |
| LGSA: #Participants: 2                 |                   |                         |                   | -0.167*** (0.033) |                   |
| LGSA: #Participants: 3                 |                   |                         |                   | -0.201*** (0.027) |                   |
| LGSA: #Participants: 4                 |                   |                         |                   | -0.218*** (0.028) |                   |
| LGSA: #Participants: 5                 |                   |                         |                   | -0.172*** (0.030) |                   |
| LGSA: #Participants: 6-8               |                   |                         |                   | -0.093*** (0.023) |                   |
| LGSA: #Participants: 9+                |                   |                         |                   | -0.098*** (0.030) |                   |
| LGSA: Tenant exercised RFR             |                   |                         |                   |                   | -0.169*** (0.016) |
| LGSA: Tenant won by own bid            |                   |                         |                   |                   | -0.385*** (0.029) |
| LGSA: Tenant rejected RFR              |                   |                         |                   |                   | -0.056*** (0.017) |
| Weight                                 | Yes               | Yes                     | Yes               | Yes               | Yes               |
| Year and county dummy                  | Yes               | Yes                     | Yes               | Yes               | Yes               |
| Treated Observations                   | 926               | 929                     | 926               | 926               | 926               |
| Control Observations                   | 1489              | 1489                    | 1489              | 1489              | 1489              |
| Pseudo-R <sup>2</sup> / R <sup>2</sup> | 0.253             | 0.276                   | 0.851             | 0.852             | 0.852             |
| $\theta$                               | 12.64 (1.46)      | 8.87 (0.87)             |                   |                   |                   |

Note: Heteroscedasticity-consistent standard errors in parentheses. Asterisks indicate \*p = <0.1; \*\*p = <0.05; \*\*\*p = <0.01. Parameter estimates for year and county dummy variables are reported in the next table. For (3a)–(3b), R<sup>2</sup> is specified as the squared correlation coefficient between observed and fitted values.

**Table D4:** Parameter estimates for county and year dummy variables: Three-nearest neighbor matching based on Mahalanobis Distance

|                        | (3a)      |         | (3b)                               |         | (5a)      |         | (5b)       |         | (5c)       |         |
|------------------------|-----------|---------|------------------------------------|---------|-----------|---------|------------|---------|------------|---------|
|                        | ln(n-1)   |         | ln(n <sup>n<sup>RH</sup>-1</sup> ) |         | log(p)    |         | log(p)     |         | log(p)     |         |
| <i>Year</i>            |           |         |                                    |         |           |         |            |         |            |         |
| 2008                   | 0.002     | (0.078) | 0.020                              | (0.088) | 0.223***  | (0.031) | 0.215 ***  | (0.031) | 0.217 ***  | (0.031) |
| 2009                   | 0.121*    | (0.073) | 0.132                              | (0.083) | 0.295***  | (0.030) | 0.290 ***  | (0.030) | 0.298 ***  | (0.029) |
| 2010                   | 0.061     | (0.078) | 0.084                              | (0.087) | 0.416***  | (0.032) | 0.410 ***  | (0.032) | 0.416 ***  | (0.031) |
| 2011                   | 0.154**   | (0.073) | 0.169**                            | (0.081) | 0.557***  | (0.031) | 0.556 ***  | (0.031) | 0.556 ***  | (0.030) |
| 2012                   | 0.188***  | (0.070) | 0.225***                           | (0.080) | 0.683***  | (0.033) | 0.677 ***  | (0.033) | 0.683 ***  | (0.031) |
| 2013                   | 0.429***  | (0.079) | 0.450***                           | (0.086) | 0.808***  | (0.033) | 0.812 ***  | (0.033) | 0.812 ***  | (0.033) |
| 2014                   | 0.226***  | (0.070) | 0.257***                           | (0.079) | 1.009***  | (0.029) | 1.007 ***  | (0.029) | 1.007 ***  | (0.029) |
| 2015                   | 0.153**   | (0.073) | 0.175**                            | (0.081) | 1.064***  | (0.030) | 1.065 ***  | (0.030) | 1.070 ***  | (0.029) |
| 2016                   | -0.116    | (0.078) | -0.113                             | (0.088) | 1.076***  | (0.032) | 1.074 ***  | (0.032) | 1.064 ***  | (0.032) |
| 2017                   | -0.153**  | (0.071) | -0.153*                            | (0.080) | 1.106***  | (0.030) | 1.103 ***  | (0.030) | 1.109 ***  | (0.029) |
| 2018                   | -0.211*** | (0.079) | -0.196**                           | (0.087) | 1.107***  | (0.035) | 1.103 ***  | (0.035) | 1.112 ***  | (0.033) |
| <i>County</i>          |           |         |                                    |         |           |         |            |         |            |         |
| Altmarkkreis Salzwedel | 0.523***  | (0.102) | 0.621***                           | (0.110) | -0.155*** | (0.048) | -0.153 *** | (0.048) | -0.174 *** | (0.048) |
| Börde                  | 0.36***   | (0.056) | 0.432***                           | (0.062) | 0.242***  | (0.024) | 0.235 ***  | (0.024) | 0.228 ***  | (0.024) |
| Burgenlandkreis        | 0.384***  | (0.073) | 0.442***                           | (0.078) | 0.085***  | (0.030) | 0.085 ***  | (0.030) | 0.073 **   | (0.030) |
| Dessau-Roßlau          | -0.005    | (0.091) | -0.143                             | (0.148) | -0.111    | (0.076) | -0.118     | (0.075) | -0.103     | (0.075) |
| Halle (Saale)          | -0.191    | (0.134) | -0.143                             | (0.134) | 0.104     | (0.172) | 0.089      | (0.169) | 0.091      | (0.173) |
| Harz                   | 0.388***  | (0.063) | 0.466***                           | (0.069) | 0.225***  | (0.027) | 0.213 ***  | (0.028) | 0.205 ***  | (0.027) |
| Jerichower Land        | 0.500***  | (0.067) | 0.568***                           | (0.076) | -0.117*** | (0.034) | -0.122 *** | (0.034) | -0.117 *** | (0.033) |
| Magdeburg              | 0.066     | (0.111) | 0.039                              | (0.123) | 0.126*    | (0.075) | 0.123 *    | (0.074) | 0.121 *    | (0.070) |
| Mansfeld-Südharz       | 0.193***  | (0.064) | 0.216***                           | (0.075) | -0.009    | (0.030) | -0.009     | (0.030) | -0.012     | (0.030) |
| Saalekreis             | 0.361***  | (0.060) | 0.396***                           | (0.065) | 0.087***  | (0.026) | 0.084 ***  | (0.026) | 0.083 ***  | (0.026) |
| Salzlandkreis          | 0.141***  | (0.053) | 0.207***                           | (0.061) | 0.099***  | (0.024) | 0.093 ***  | (0.024) | 0.076 ***  | (0.024) |
| Stendal                | 0.394***  | (0.077) | 0.460***                           | (0.084) | -0.002    | (0.035) | -0.010     | (0.034) | -0.007     | (0.033) |
| Wittenberg             | 0.067     | (0.088) | 0.038                              | (0.111) | -0.268*** | (0.037) | -0.267 *** | (0.036) | -0.260 *** | (0.034) |
| Altenburger Land       | -0.068    | (0.171) | -0.002                             | (0.169) | 0.194**   | (0.084) | 0.184 **   | (0.084) | 0.177 **   | (0.085) |
| Gera                   | -0.136    | (0.157) | -0.030                             | (0.163) | -0.002    | (0.070) | -0.021     | (0.074) | -0.027     | (0.067) |
| Greiz                  | 0.162     | (0.370) | 0.269                              | (0.375) | 0.204***  | (0.054) | 0.198 ***  | (0.052) | 0.183 ***  | (0.051) |
| Kyffhäuserkreis        | 0.570***  | (0.073) | 0.616***                           | (0.077) | -0.000    | (0.034) | 0.005      | (0.035) | -0.004     | (0.035) |
| Nordhausen             | 0.338**   | (0.138) | 0.402***                           | (0.138) | 0.201***  | (0.048) | 0.192 ***  | (0.047) | 0.189 ***  | (0.047) |
| Saale Holzland Kreis   | 0.215**   | (0.106) | 0.296***                           | (0.113) | 0.124*    | (0.070) | 0.108      | (0.068) | 0.113      | (0.069) |
| Sömmerda               | 0.162*    | (0.086) | 0.215**                            | (0.089) | -0.003    | (0.042) | -0.008     | (0.042) | -0.013     | (0.042) |
| Weimarer Land          | 0.364***  | (0.139) | 0.430***                           | (0.140) | 0.064     | (0.067) | 0.056      | (0.067) | 0.054      | (0.067) |
| Leipzig                | 0.353***  | (0.106) | 0.423***                           | (0.108) | 0.095**   | (0.046) | 0.089 **   | (0.045) | 0.086 *    | (0.046) |
| Nordsachsen            | 0.701***  | (0.100) | 0.774***                           | (0.104) | 0.095**   | (0.044) | 0.097 **   | (0.044) | 0.089 **   | (0.044) |
| Elbe-Elster            | 0.371*    | (0.199) | 0.472**                            | (0.203) | -0.294*** | (0.075) | -0.304 *** | (0.076) | -0.311 *** | (0.075) |
| Havelland              | 0.328***  | (0.099) | 0.426***                           | (0.103) | -0.111*** | (0.041) | -0.122 *** | (0.041) | -0.126 *** | (0.040) |
| Ostprignitz-Ruppin     | 0.320**   | (0.150) | 0.421***                           | (0.153) | -0.132**  | (0.053) | -0.142 *** | (0.052) | -0.150 *** | (0.053) |
| Potsdam-Mittelmark     | 0.282*    | (0.148) | 0.384**                            | (0.150) | -0.226*** | (0.056) | -0.238 *** | (0.056) | -0.245 *** | (0.056) |
| Prignitz               | 0.310***  | (0.111) | 0.41***                            | (0.114) | 0.031     | (0.044) | 0.018      | (0.043) | 0.016      | (0.044) |
| Teltow-Fläming         | -0.004    | (0.240) | 0.109                              | (0.246) | -0.059    | (0.090) | -0.069     | (0.091) | -0.083     | (0.090) |

Note: Heteroscedasticity-consistent standard errors in parentheses (White 1980). Asterisks indicate \*p < 0.1; \*\*p < 0.05; \*\*\*p < 0.01.

**Table D5:** Post-matching regression results: Kernel matching based on Mahalanobis Distance

|                                        | (3a)        |         | 3(b)                    |         | (5a)      |         | (5b)      |         | (5c)      |         |
|----------------------------------------|-------------|---------|-------------------------|---------|-----------|---------|-----------|---------|-----------|---------|
|                                        | ln(n-1)     |         | ln(n <sup>nRH</sup> -1) |         | log(p)    |         | log(p)    |         | log(p)    |         |
| Intercept                              | -0.066      | (0.160) | -0.284                  | (0.180) |           |         |           |         |           |         |
| <i>Hedonic characteristics</i>         |             |         |                         |         |           |         |           |         |           |         |
| Soil quality                           | 0.011***    | (0.001) | 0.012***                | (0.001) | 0.013***  | (0.001) | 0.013***  | (0.001) | 0.013***  | (0.001) |
| Lot Size <sup>2</sup>                  | 0.003***    | (0.000) | 0.003***                | (0.000) | 0.001***  | (0.000) | 0.001***  | (0.000) | 0.001***  | (0.000) |
| Share grassland                        | -0.003***   | (0.001) | -0.004***               | (0.001) | -0.006*** | (0.001) | -0.006*** | (0.001) | -0.006*** | (0.001) |
| Share other land                       | -0.014***   | (0.003) | -0.016***               | (0.004) | -0.011*** | (0.002) | -0.011*** | (0.002) | -0.011*** | (0.002) |
| <i>Participant class</i>               |             |         |                         |         |           |         |           |         |           |         |
| #Participants: 2                       |             |         |                         |         | -1.243*** | (0.058) | -1.243*** | (0.061) | -1.210*** | (0.058) |
| #Participants: 3                       |             |         |                         |         | -1.166*** | (0.056) | -1.145*** | (0.059) | -1.146*** | (0.055) |
| #Participants: 4                       |             |         |                         |         | -1.130*** | (0.057) | -1.086*** | (0.062) | -1.121*** | (0.056) |
| #Participants: 5                       |             |         |                         |         | -1.052*** | (0.058) | -1.042*** | (0.063) | -1.052*** | (0.057) |
| #Participants: 6-8                     |             |         |                         |         | -0.985*** | (0.059) | -0.996*** | (0.061) | -0.991*** | (0.058) |
| #Participants: 9+                      |             |         |                         |         | -0.992*** | (0.063) | -1.036*** | (0.065) | -0.993*** | (0.062) |
| <i>Tenant support effects with RFR</i> |             |         |                         |         |           |         |           |         |           |         |
| LGSA                                   | -0.054      | (0.050) | -0.286***               | (0.051) | -0.179*** | (0.019) |           |         |           |         |
| LGSA: #Participants: 2                 |             |         |                         |         |           |         | -0.166*** | (0.045) |           |         |
| LGSA: #Participants: 3                 |             |         |                         |         |           |         | -0.210*** | (0.033) |           |         |
| LGSA: #Participants: 4                 |             |         |                         |         |           |         | -0.246*** | (0.041) |           |         |
| LGSA: #Participants: 5                 |             |         |                         |         |           |         | -0.188*** | (0.038) |           |         |
| LGSA: #Participants: 6-8               |             |         |                         |         |           |         | -0.153*** | (0.036) |           |         |
| LGSA: #Participants: 9+                |             |         |                         |         |           |         | -0.049    | (0.034) |           |         |
| LGSA: Tenant exercised RFR             |             |         |                         |         |           |         |           |         | -0.185*** | (0.020) |
| LGSA: Tenant won by own bid            |             |         |                         |         |           |         |           |         | -0.401*** | (0.032) |
| LGSA: Tenant rejected RFR              |             |         |                         |         |           |         |           |         | -0.070*** | (0.021) |
| Weight                                 | Yes         |         | Yes                     |         | Yes       |         | Yes       |         | Yes       |         |
| Year and county dummy                  | Yes         |         | Yes                     |         | Yes       |         | Yes       |         | Yes       |         |
| Treated Observations                   | 926         |         | 929                     |         | 926       |         | 926       |         | 926       |         |
| Control Observations                   | 2973        |         | 2973                    |         | 2973      |         | 2973      |         | 2973      |         |
| Pseudo-R <sup>2</sup> / R <sup>2</sup> | 0.159       |         | 0.161                   |         | 0.743     |         | 0.743     |         | 0.743     |         |
| $\theta$                               | 14.62 (2.1) |         | 9.93 (1.23)             |         |           |         |           |         |           |         |

Note: Heteroscedasticity-consistent standard errors in parentheses. Asterisks indicate \*p = <0.1; \*\*p = <0.05; \*\*\*p = <0.01. Parameter estimates for year and county dummy variables are reported in the next table. For (3a)–(3b), R<sup>2</sup> is specified as the squared correlation coefficient between observed and fitted values.

**Table D6:** Parameter estimates for county and year dummy variables: Kernel matching based on Mahalanobis Distance

|                        | (3a)      |         | (3b)                               |         | (5a)      |         | (5b)       |         | (5c)       |         |
|------------------------|-----------|---------|------------------------------------|---------|-----------|---------|------------|---------|------------|---------|
|                        | ln(n-1)   |         | ln(n <sup>n<sup>RH</sup></sup> -1) |         | log(p)    |         | log(p)     |         | log(p)     |         |
| <i>Year</i>            |           |         |                                    |         |           |         |            |         |            |         |
| 2008                   | 0.212*    | (0.122) | 0.262*                             | (0.138) | 0.259***  | (0.043) | 0.248 ***  | (0.043) | 0.252 ***  | (0.043) |
| 2009                   | 0.359***  | (0.122) | 0.407***                           | (0.138) | 0.356***  | (0.039) | 0.348 ***  | (0.039) | 0.362 ***  | (0.038) |
| 2010                   | 0.240*    | (0.126) | 0.297**                            | (0.141) | 0.506***  | (0.042) | 0.499 ***  | (0.041) | 0.508 ***  | (0.042) |
| 2011                   | 0.351***  | (0.125) | 0.394***                           | (0.139) | 0.619***  | (0.040) | 0.620 ***  | (0.039) | 0.619 ***  | (0.040) |
| 2012                   | 0.302***  | (0.115) | 0.368***                           | (0.131) | 0.767***  | (0.045) | 0.757 ***  | (0.044) | 0.767 ***  | (0.045) |
| 2013                   | 0.754***  | (0.132) | 0.801***                           | (0.142) | 0.940***  | (0.045) | 0.957 ***  | (0.045) | 0.950 ***  | (0.044) |
| 2014                   | 0.404***  | (0.133) | 0.456***                           | (0.145) | 1.048***  | (0.042) | 1.051 ***  | (0.041) | 1.045 ***  | (0.042) |
| 2015                   | 0.248*    | (0.133) | 0.295**                            | (0.146) | 1.166***  | (0.040) | 1.169 ***  | (0.041) | 1.172 ***  | (0.040) |
| 2016                   | -0.164    | (0.141) | -0.157                             | (0.157) | 1.134***  | (0.040) | 1.129 ***  | (0.040) | 1.117 ***  | (0.040) |
| 2017                   | -0.123    | (0.121) | -0.123                             | (0.137) | 1.19***   | (0.039) | 1.188 ***  | (0.039) | 1.197 ***  | (0.039) |
| 2018                   | -0.106    | (0.134) | -0.068                             | (0.149) | 1.168***  | (0.046) | 1.162 ***  | (0.046) | 1.176 ***  | (0.043) |
| <i>County</i>          |           |         |                                    |         |           |         |            |         |            |         |
| Altmarkkreis Salzwedel | 0.494***  | (0.159) | 0.62***                            | (0.185) | -0.063    | (0.057) | -0.054     | (0.057) | -0.084     | (0.057) |
| Börde                  | 0.486***  | (0.075) | 0.563***                           | (0.082) | 0.219***  | (0.029) | 0.220 ***  | (0.029) | 0.209 ***  | (0.028) |
| Burgenlandkreis        | 0.432***  | (0.126) | 0.525***                           | (0.142) | 0.211***  | (0.052) | 0.216 ***  | (0.053) | 0.192 ***  | (0.056) |
| Dessau-Roßlau          | 0.107     | (0.103) | -0.03                              | (0.177) | -0.055    | (0.082) | -0.067     | (0.079) | -0.045     | (0.078) |
| Halle (Saale)          | -0.093    | (0.121) | -0.018                             | (0.132) | -0.063    | (0.257) | -0.078     | (0.251) | -0.077     | (0.259) |
| Harz                   | 0.546***  | (0.085) | 0.639***                           | (0.091) | 0.210***  | (0.032) | 0.204 ***  | (0.032) | 0.190 ***  | (0.031) |
| Jerichower Land        | 0.630***  | (0.080) | 0.723***                           | (0.093) | -0.088**  | (0.043) | -0.090 **  | (0.043) | -0.086 **  | (0.042) |
| Magdeburg              | 0.301*    | (0.181) | 0.204                              | (0.234) | 0.074     | (0.148) | 0.088      | (0.147) | 0.075      | (0.131) |
| Mansfeld-Südharz       | 0.225**   | (0.103) | 0.259**                            | (0.116) | 0.007     | (0.032) | 0.009      | (0.032) | 0.004      | (0.031) |
| Saalekreis             | 0.376***  | (0.085) | 0.43***                            | (0.093) | 0.095***  | (0.035) | 0.092 ***  | (0.035) | 0.092 ***  | (0.035) |
| Salzlandkreis          | 0.064     | (0.072) | 0.124                              | (0.082) | 0.056*    | (0.030) | 0.050 *    | (0.029) | 0.034      | (0.030) |
| Stendal                | 0.230*    | (0.127) | 0.275*                             | (0.141) | 0.049     | (0.086) | 0.038      | (0.084) | 0.050      | (0.078) |
| Wittenberg             | 0.106     | (0.111) | 0.025                              | (0.154) | -0.230*** | (0.049) | -0.226 *** | (0.049) | -0.217 *** | (0.044) |
| Altenburger Land       | 0.012     | (0.090) | 0.115                              | (0.103) | 0.551***  | (0.041) | 0.514 ***  | (0.048) | 0.529 ***  | (0.040) |
| Gera                   | 0.229     | (0.200) | 0.396                              | (0.209) | 0.079**   | (0.035) | 0.065 *    | (0.039) | 0.046      | (0.034) |
| Greiz                  | -0.676*** | (0.136) | -0.56***                           | (0.145) | 0.318***  | (0.082) | 0.327 ***  | (0.086) | 0.287 ***  | (0.087) |
| Kyffhäuserkreis        | 0.420***  | (0.136) | 0.501 ***                          | (0.142) | 0.045     | (0.061) | 0.048      | (0.061) | 0.037      | (0.062) |
| Nordhausen             | 0.187     | (0.168) | 0.302*                             | (0.172) | 0.289**   | (0.131) | 0.278 **   | (0.132) | 0.269 **   | (0.129) |
| Saale Holzland Kreis   | 0.129     | (0.158) | 0.257                              | (0.169) | 0.187     | (0.124) | 0.177      | (0.126) | 0.169      | (0.123) |
| Sömmerda               | -0.210    | (0.252) | -0.126                             | (0.258) | 0.070     | (0.081) | 0.063      | (0.078) | 0.051      | (0.085) |
| Weimarer Land          | 1.186***  | (0.326) | 1.377***                           | (0.347) | 0.346**   | (0.158) | 0.344 **   | (0.159) | 0.345 **   | (0.159) |
| Leipzig                | 0.743***  | (0.132) | 0.853***                           | (0.142) | 0.006     | (0.102) | 0.006      | (0.097) | 0.013      | (0.097) |
| Nordsachsen            | 0.474***  | (0.148) | 0.604***                           | (0.160) | 0.255***  | (0.087) | 0.239 ***  | (0.084) | 0.247 ***  | (0.085) |
| Elbe-Elster            | 0.545***  | (0.100) | 0.685***                           | (0.112) | -0.200*** | (0.056) | -0.234 *** | (0.060) | -0.216 *** | (0.055) |
| Havelland              | 0.669***  | (0.138) | 0.803***                           | (0.144) | -0.041    | (0.082) | -0.048     | (0.082) | -0.049     | (0.080) |
| Ostprignitz-Ruppin     | 0.300     | (0.185) | 0.456**                            | (0.192) | 0.210     | (0.137) | 0.201      | (0.142) | 0.191      | (0.132) |
| Potsdam-Mittelmark     | 0.450**   | (0.217) | 0.596***                           | (0.218) | -0.240*** | (0.069) | -0.250 *** | (0.070) | -0.260 *** | (0.068) |
| Prignitz               | 0.900***  | (0.197) | 1.027***                           | (0.199) | -0.102    | (0.074) | -0.098     | (0.073) | -0.114 *   | (0.069) |
| Teltow-Fläming         | -0.208    | (0.331) | -0.062                             | (0.358) | 0.243**   | (0.112) | 0.243 **   | (0.119) | 0.212 *    | (0.110) |

Note: Heteroscedasticity-consistent standard errors in parentheses (White 1980). Asterisks indicate \*p = &lt;0.1; \*\*p = &lt;0.05; \*\*\*p = &lt;0.01.
